# 1 **Single-cell selectivity and functional architecture of human lateral occipital complex**

2 Functional architecture of LOC

3

4 Thomas Decramer<sup>1,2,3#</sup>, Elsie Premereur<sup>1#\*</sup>, Mats Uytterhoeven<sup>3</sup>, Wim Van Paesschen<sup>4,5</sup>, Johannes  
5 van Loon<sup>2,3</sup>, Peter Janssen<sup>1+</sup>, Tom Theys<sup>2,3+</sup>

6 1. Laboratory for Neuro- and Psychophysiology, KU Leuven and the Leuven Brain Institute,  
7 Leuven, Belgium

8 2. Department of Neurosurgery, University Hospitals Leuven, Leuven, Belgium

9 3. Research Group Experimental Neurosurgery and Neuroanatomy, KU Leuven and the Leuven  
10 Brain Institute, Leuven, Belgium

11 4. Department of Neurology, University Hospitals Leuven, Leuven, Belgium

12 5. Laboratory for Epilepsy Research, KU Leuven, Leuven, Belgium

13

14 #shared first author; +shared senior author

15 \*Lead Contact: [elsie.premereur@kuleuven.be](mailto:elsie.premereur@kuleuven.be)

## 16 **Author contributions**

17 TD, EP, PJ and TT designed experiment

18 TD, MU and TT collected data

19 EP, TD performed data-analysis

20 TD, EP, PJ, TT, WVP, and JvL wrote the paper

## 21 **Abstract**

22 The human lateral occipital complex (LOC) is more strongly activated by images of objects compared  
23 to scrambled controls, but detailed information at the neuronal level is currently lacking. We recorded  
24 with microelectrode arrays in the LOC of two patients, and obtained highly selective single-unit, multi-  
25 unit and high-gamma responses to images of objects. Contrary to predictions derived from functional  
26 imaging studies, all neuronal properties indicated that the subsector of LOC we recorded from  
27 occupies an unexpectedly high position in the hierarchy of visual areas. Notably, the response  
28 latencies of LOC neurons were long, the shape selectivity was spatially clustered, LOC receptive fields  
29 were large and bilateral, and a number of LOC neurons exhibited 3D-structure selectivity (a preference  
30 for convex or concave stimuli), which are all properties typical of end-stage ventral stream areas. Thus,  
31 our results challenge prevailing ideas about the position of the LOC in the hierarchy of visual areas.

32

## 33 **Introduction**

34 Our understanding of the human brain is hampered by the limitations imposed upon  
35 neuroscience research in humans. Noninvasive measurements of brain activity (EEG, functional  
36 Magnetic Resonance Imaging or fMRI) often provide only coarse information regarding neural activity,  
37 due to their limited spatial or temporal resolution. Genuine insight into the function of a brain area  
38 requires detailed measurements of the electrical activity of individual neurons and small populations  
39 of neurons at high spatiotemporal resolution. Intracortical electrophysiological recordings in humans  
40 are scarce, therefore the human visual cortex is virtually unexplored at the level of the individual  
41 neurons and small populations of neurons. Several studies have recorded field potentials with  
42 intracranial electrodes (Allison et al., 1999, Arroyo et al., 1993, Yoshor et al., 2007), but  
43 macroelectrode recordings still reflect activity of hundreds of thousands of neurons and, due to their  
44 large contact area, cannot measure spiking activity, nor can they reveal the microarchitecture of visual

45 cortex on a submillimeter scale. A series of studies using depth electrodes in the mesial temporal lobe  
46 have investigated the visual responses of single neurons in entorhinal and perirhinal cortex (Fried et  
47 al., 1997, Kreiman et al., 2000b, Kreiman et al., 2000a, Kreiman et al., 2002, Quiroga et al., 2005, Quian  
48 Quiroga et al., 2009), and one study (Aflalo et al., 2015) reported single-unit responses during  
49 imagined actions (reaching and grasping) in a patient with a microelectrode array implanted in parietal  
50 cortex, who thereby obtained accurate control over a robot arm. (Self et al., 2016) measured multi-  
51 unit activity (MUA) and local field potential (LFP) activity in early visual areas (V2/V3) in a patient using  
52 hybrid macro-micro depth electrodes. This study observed that the properties of populations of  
53 neurons (multi-unit receptive fields, tuning for contrast, orientation, spatial frequency and modulation  
54 by context and attention) were similar to those of neurons in the macaque areas V2 and V3. To our  
55 knowledge, intracortical recordings in intermediate human visual areas such as the Lateral Occipital  
56 Complex (LOC) have never been performed.

57 Recordings in patients, combined with similar measurements in monkeys, may allow us to  
58 answer very specific questions with regard to the properties of individual neurons and the homologies  
59 between cortical areas in humans and monkeys. For example, assessing the shape selectivity or the  
60 receptive field profile of LOC neurons requires intracortical recordings, which have never been  
61 performed. Moreover, despite two decades of functional imaging studies in both species (Vanduffel  
62 et al., 2014), the homologies between the (subsectors of) LOC and ventral occipitotemporal cortex in  
63 humans and the monkey inferior temporal cortex (ITC) areas has not yet been resolved. The LO1 and  
64 LO2 subsector may be retinotopically organized (Wandell et al., 2007, Silson et al., 2013), similar to  
65 the monkey area TEO (Boussaoud et al., 1991), but direct single-cell evidence in the two species is  
66 lacking. Furthermore, the microarchitecture of these areas in humans (i.e. the spatial clustering of  
67 shape selectivity on the scale of cortical columns measuring 0.5 mm) is very difficult to assess with  
68 fMRI (Goncalves et al., 2015). To investigate the clustering of neuronal selectivity in human visual  
69 cortex, recordings with intracortical microelectrodes are necessary.

70

## 71 Results

72 In two patients who were evaluated for refractory epilepsy, we ran an LOC-localizer fMRI  
73 experiment, in which blocks of non-scrambled shapes and outlines were interleaved with control  
74 blocks of scrambled stimuli (Fig. 1, (Kourtzi and Kanwisher, 2000)). A 96-channel Utah microelectrode  
75 array was implanted in LOC (Fig. 1A; MNI coordinates 55, -71, 1 for patient 1, and -55, -77, 6 for patient  
76 2) (Silson et al., 2013). We verified the anatomical location of the array using a computed tomography  
77 (CT) scan obtained after array implantation, which was co-registered onto the anatomical MRI. Figure  
78 1B shows the fMRI activations in the two patients for the contrast non-scrambled vs. scrambled  
79 stimuli, plotted on the patient's own anatomical MRI ( $p < 0.05$ , FWE corrected). The fMRI results  
80 confirmed that the microelectrode arrays were indeed implanted in the hotspot of fMRI activations.

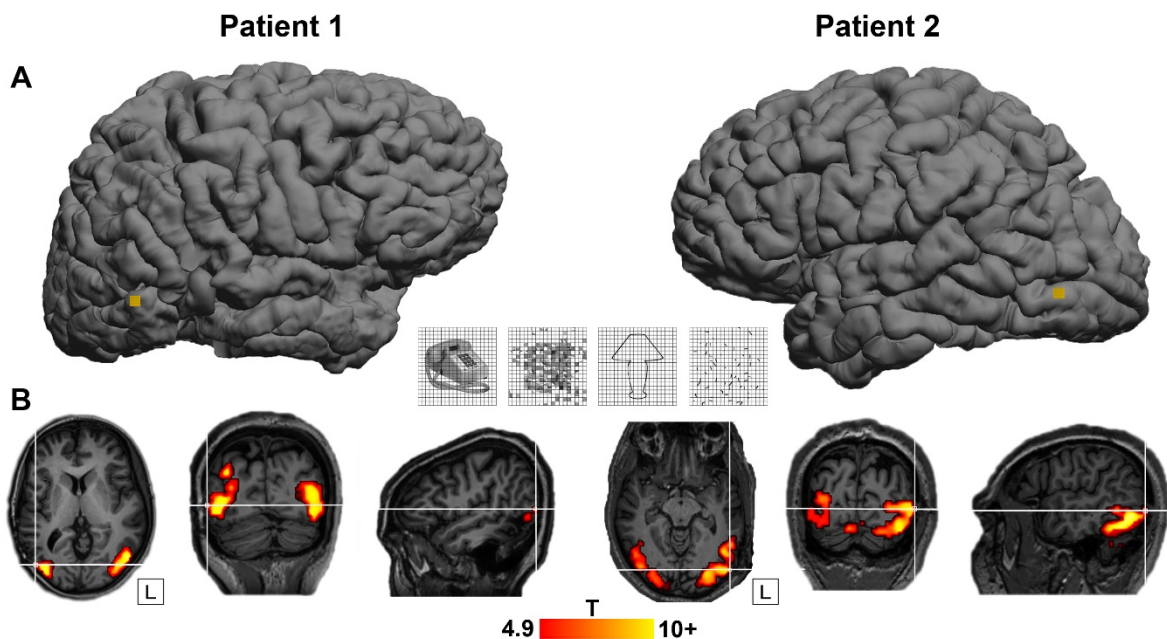

81

82 *Figure 1. LO Localizer and location of arrays. A. Site of Utah array implantation (yellow)*  
83 *projected onto 3D rendering of the brain in patient 1 (left) and patient 2 (right). Center: LO Localizer*  
84 *stimuli (shapes, scrambled shapes, outlines, scrambled outlines). B. fMRI activations with LO localizer*  
85 *stimuli. T-values for contrast [shapes+outlines]-[scrambled shapes+scrambled outlines], plotted on T1*  
86 *weighted image.  $P < 0.05$ , FWE-corrected for multiple comparisons. Crosshair indicates the position of*  
87 *the Utah array in relation to the fMRI activation for both patients.*

88

## 89 Effect of image scrambling

90 The example neuron in Figure 2A responded significantly more strongly to images of objects  
91 (both shapes and outlines) compared to scrambled controls (permutation test:  $p < 0.001$ ,  $d' = 0.72$  for  
92 shapes and  $p = 0.002$ ,  $d' = 0.50$  for line stimuli). Unlike previous recordings in the human medial  
93 temporal lobe (Kreiman et al., 2000b, Quiroga et al., 2005), this neuronal response was brisk and  
94 relatively transient (response and selectivity latency: 125 ms). The large waveform (inset in Figure 2A)  
95 indicates that this neuron was well-isolated.

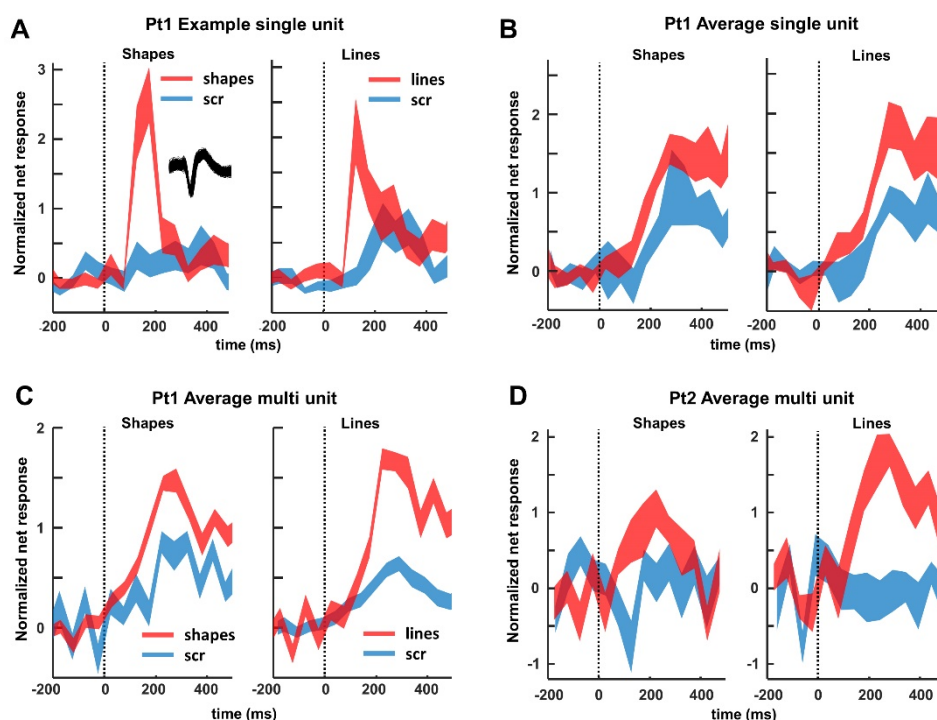

96

97 *Figure 2. Single- and multiunit responses to images of objects and scrambled controls. A.*  
98 *Example neuron. Average response to intact (red) and scrambled (blue) shapes (left) and line stimuli*  
99 *(right). The inset illustrates the spike waveform. B. Average single-unit responses across all visually*  
100 *responsive channels in patient 1. C and D. Average multiunit responses to intact and scrambled stimuli*  
101 *in patient 1 and 2, respectively, across all visually responsive channels.*

102 We recorded neuronal responses to images of objects in patient 1 in two separate sessions  
103 (number of channels: 174), and detected 42 visually-responsive single units (average normalized net  
104 response in Fig 2B). Entirely consistent with the fMRI results, half of these neurons (21/42) responded  
105 significantly more strongly to intact than to scrambled images of objects (permutation test non-

106 scrambled versus scrambled:  $p < 0.05$ ; median  $d'$  index: 0.35), and no single unit showed a significant  
107 preference for scrambled controls. The median response latency of these 21 selective neurons  
108 (calculated on the responses to intact shapes and outlines) was 150 ms, whereas the fastest neurons  
109 (percentile 10) started to respond at 75 ms after stimulus onset. However, the median selectivity  
110 latency (i.e. the first bin with significant response differences between intact and scrambled images)  
111 was much higher (225 ms), and no neuron started to discriminate between intact and scrambled  
112 stimuli before 75 ms. We obtained highly similar results for MUA in both patients (Figure 2C and D). A  
113 large number (46 out of 83) of the visually responsive channels preferred intact over scrambled shapes  
114 (41 out of 71 for pt1, 5 out of 12 for patient 2; permutation test:  $p < 0.05$ ; median  $d'$ : Pt1: 0.45, Pt2:  
115 0.28). Not surprisingly, the average multi-unit response of all visually-responsive channels was greater  
116 for non-scrambled stimuli than for scrambled controls ( $p < 0.001$ , permutation test, Fig 2C and D).

117         When looking at the LFP signal that was recorded together with the spiking activity, virtually  
118 all channels responded significantly to visual stimulation (80-120Hz, or high-gamma power intact  
119 shapes versus pre-stimulus baseline ; permutation test,  $p < 0.05$ ; pt1:  $n = 164/174$  or 94%; pt2:  $n =$   
120  $269/285$  or 94%). On average, we observed a broad-band response after stimulus onset in all four  
121 conditions (permutation test,  $p < 0.01$ , corrected for multiple comparisons, Figure 3), in which the LFP  
122 response to intact shapes and outlines was significantly stronger than to scrambled controls, both at  
123 the level of the average high gamma power and on the great majority of the individual channels  
124 (permutation test,  $p < 0.001$ ; pt1:  $109 / 174$  (63%) individual channels; pt2:  $242/285$  (85%) individual  
125 channels). As expected, the lower frequency bands discriminated less reliably between intact and  
126 scrambled shapes. Thus, SUA, MUA and LFP data clearly demonstrate that neurons in human LOC are  
127 more responsive to intact shapes than to scrambled shapes, confirming and validating the results of  
128 the fMRI localizer.

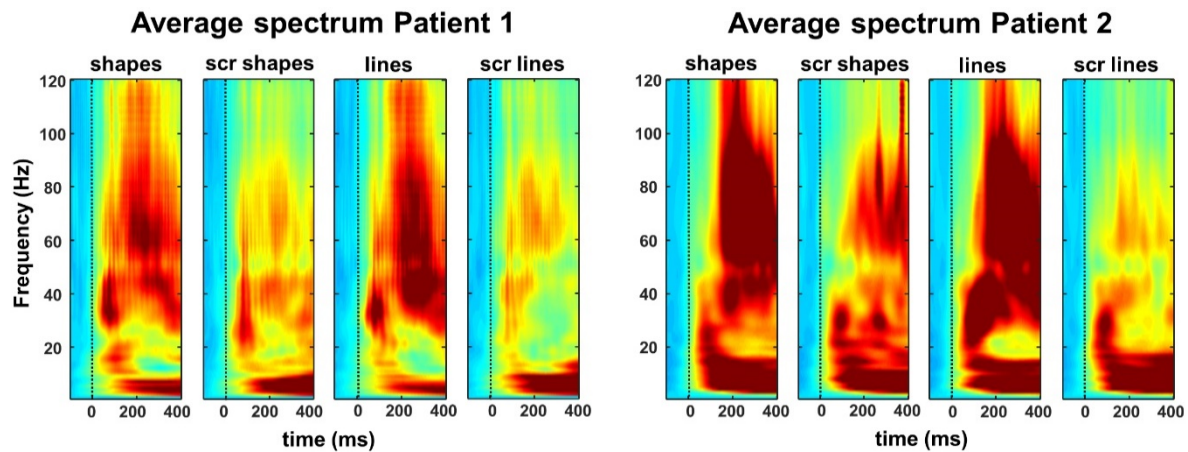

129

130 *Figure 3. Time-frequency plots of the average local field potentials (LFPs) recorded in the two*  
131 *patients, indicating that the high-gamma (80-120 Hz) power is significantly stronger for intact shapes*  
132 *and outlines than for their scrambled controls.*

133

134

### 135 **Shape selectivity and spatial clustering**

136 MUA recording sites were not only sensitive to image scrambling, but could also be selective  
137 for individual shapes (one-way ANOVA  $p < 0.05$  in 8/46 recording sites). To quantify and visualize this  
138 shape selectivity, we ranked the intact shapes based on the MUA responses (for all 46 channels with  
139 significant selectivity for image scrambling, 6 for pt1, 40 for pt2), and calculated the average MUA  
140 response to the ranked intact shapes and to the corresponding scrambled shape images (Fig. 4A and  
141 B). Despite the fact that we did not search for selective neurons, shape selectivity was nonetheless  
142 robust, since the half-maximum response was measured for rank 17 (patient 1) and 14 (patient 2), and  
143 the least-preferred shapes even evoked inhibitory responses. No significant tuning was present for  
144 the corresponding scrambled controls (see supplementary Table S1 for linear regression slopes). The  
145 results were highly similar for the single-unit responses and for the line stimuli and their scrambled  
146 controls (supplementary Figs S1, and S2 and Table S1).



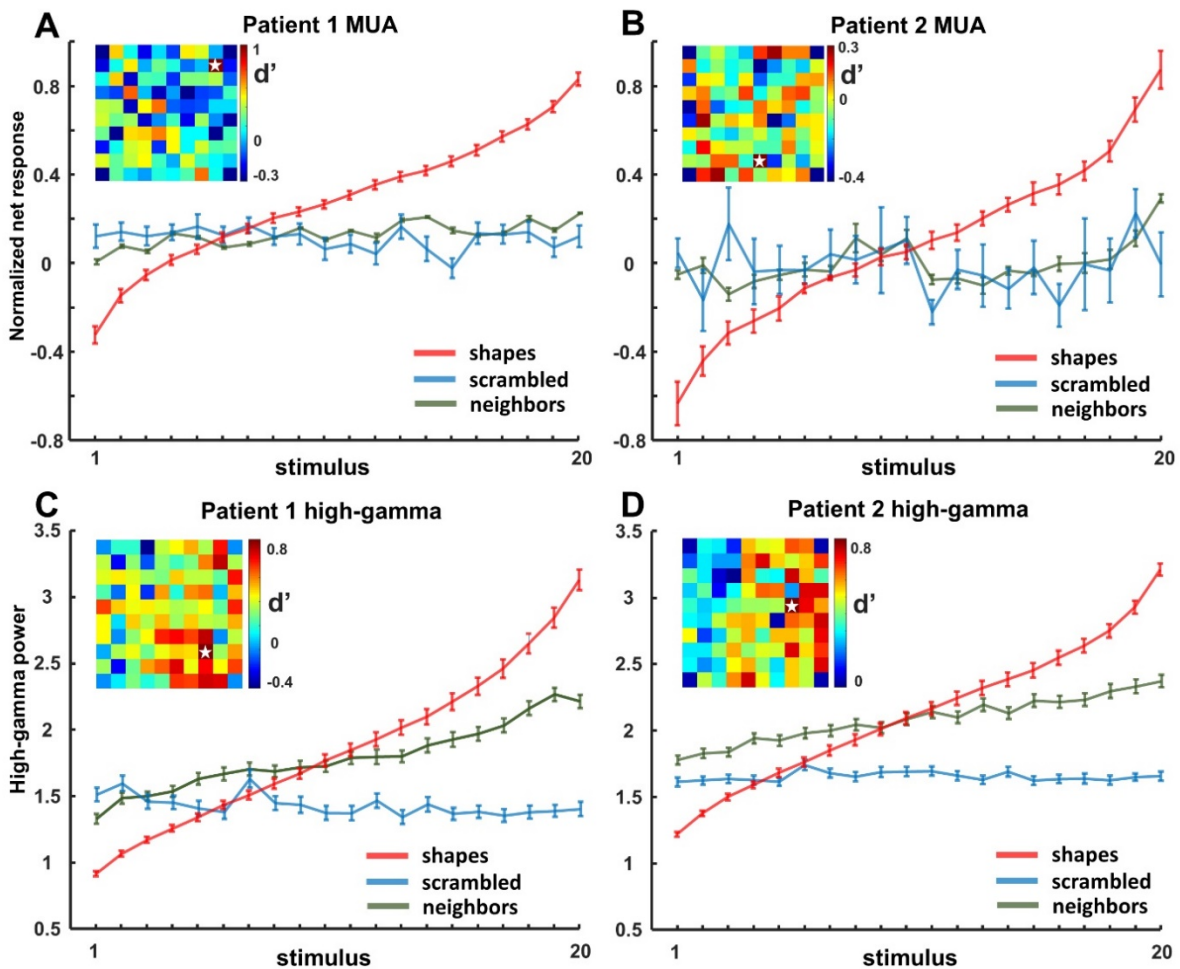

147

148 *Figure 4. Ranking of shapes for multi-unit activity (MUA) and high-gamma LFP for each patient.*  
149 *The same ranking is applied for the neighboring channels and the corresponding scrambled*  
150 *stimuli.*

151

152 The high-gamma responses to intact shapes were equally selective (Figure 4C and D; one-way  
153 ANOVA with factor *stimulus number*, for shapes:  $p < 0.05$  in 15/109 for pt1; 72/242 channels for pt2).

154 The most effective intact shape elicited 3 to 4 times more high-gamma activity than the least-  
155 preferred shape (half-maximum response for rank 15 in both patients), and no significant tuning was  
156 present for the corresponding scrambled controls.

157 Many MUA and LFP sites were sensitive to image scrambling, but the degree of sensitivity  
158 differed markedly on neighboring channels spaced a mere 400 microns apart. This unexpected spatial  
159 specificity in the MUA and high-gamma responses to image scrambling became evident in the  $d'$   
160 indices mapped on the spatial layout of the array (compare for example the  $d'$  of a highly selective



161 channel indicated with a star to its neighboring channels, Fig.4A-D, insets). To quantify this spatial  
162 specificity to image scrambling across the array, we calculated a 2-way ANOVA for the evoked high-  
163 gamma responses for each of the 109 (pt1) or 240 (pt2) selective channels with factors *scrambling*  
164 [*scrambled vs non-scrambled*] and *position* [neighboring position]. In the large majority of the  
165 channels, the main effect of *position* (pt1: N=108/109; pt2: N=235/240) or the interaction between  
166 the factors *scrambling* and *position* (pt1: N = 57/109; pt2: N=205/240) were significant ( $p < 0.05$ , highly  
167 similar results were found for MUA).

168 We also observed a high degree of spatial clustering for shape preference across the array,  
169 both at the level of MUA and at the level of high-gamma responses. For each responsive channel (the  
170 center electrode), we calculated the average responses to the intact shapes on all its neighboring  
171 channels based on the shape ranking of the center electrode (Fig. 4, green lines). The shape preference  
172 differed markedly between each center electrode and its neighbors (Fig. 4 A-D, see Table S1),  
173 indicating that the shape preference of human LOC neurons is clustered on a submillimeter scale,  
174 similar to the monkey ITC (Fujita et al., 1992, Yamane et al., 2006).

175

## 176 **Receptive fields**

177 A fundamental characteristic of visual neurons is their receptive field (RF). To map the RF of  
178 neurons in human visual cortex, we presented an intact shape at 25 positions on the screen covering  
179 a 30 by 50 deg area in both hemifields. The four example neurons recorded in patient 1 (Figure 5A)  
180 clearly demonstrate that the RFs were relatively large (average surface area 473 deg<sup>2</sup>) and covered  
181 both the ipsi- and the contralateral hemifield. Out of 46 visually responsive single neurons (stimulus  
182 vs baseline,  $p < 0.05$ , permutation test), 24 (52%) responded maximally in the contralateral hemifield,  
183 13 (28%) in the ipsilateral hemifield, and 9 neurons responded maximally at the midline (3 of which  
184 were at the fovea). Six neurons showed bilateral responses (i.e. > 50 % of the maximal response). The  
185 average RF (rightmost panel in Figure 5A) at the single-neuron level included the fovea and the  
186 ipsilateral hemifield. The average RF profile was similar when determined using the high gamma

187 responses (Figure 5B): in both patients, the high gamma RF contained the center of the visual field and  
188 visual responses (at > 50% of the maximum response) were present both contra- and ipsilaterally.  
189 Thus, the average RF in this part of the human LOC was consistently large and bilateral.

190

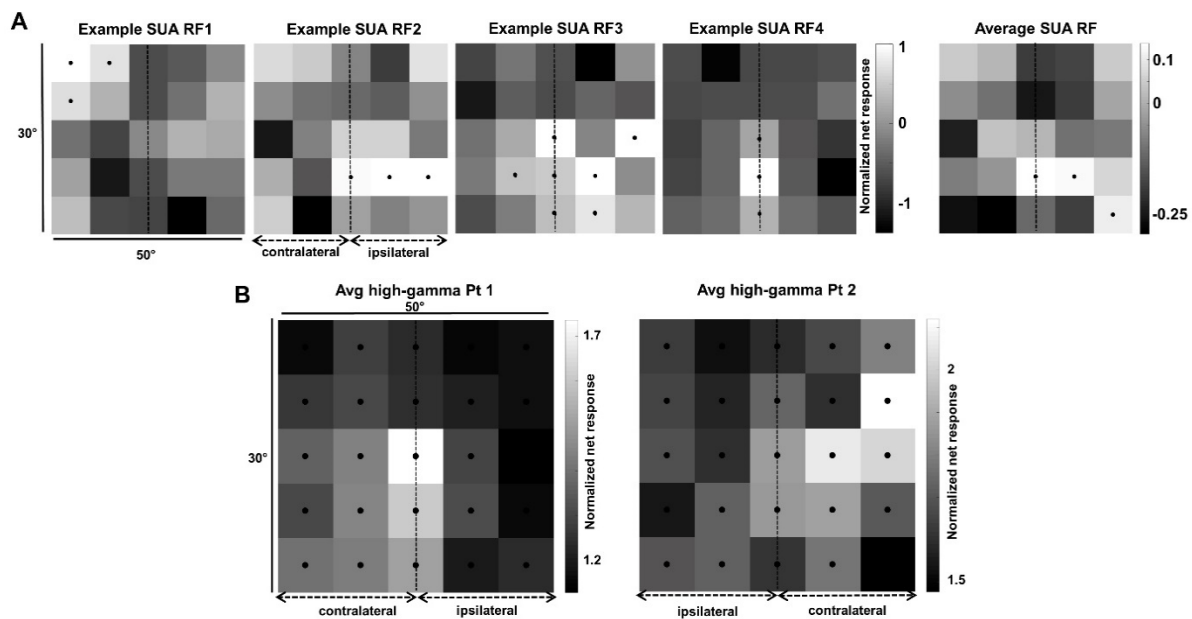

192 *Figure 5. Receptive field mapping. A. Single-unit data. The first four panels show the RFs of four*  
193 *example neurons. All responses are normalized to the maximum visual response. Black dots indicate*  
194 *responses higher than 50% of the maximum response (per channel). Rightmost panel: average*  
195 *receptive field for all visually responsive channels. B. Average RF at the level of high-gamma responses*  
196 *for patient 1 (left) and patient 2 (right).*

197

198

### 199 **Three-dimensional structure selectivity**

200 The previous results have addressed only neural responses to 2D shapes, but neurons in the  
201 macaque ITC are also selective for 3D stimuli (Janssen et al., 2000b, Yamane et al., 2008) and several  
202 human fMRI studies have suggested that the LOC is sensitive to binocular disparity (Welchman et al.,  
203 2005, Georgieva et al., 2008, Moore and Engel, 2001). To investigate the selectivity of LOC neurons  
204 for stereo stimuli, we ran a stereo-localizer fMRI experiment, in which blocks of stereo stimuli (curved  
205 and flat surfaces at different disparities) alternated with blocks of control stimuli (the monocular

206 images presented without disparity (Durand et al., 2007, Van Dromme et al., 2015)). Figure 6B shows  
 207 the T-values for the contrast [stereo] - [control], plotted on the anatomical MRI and CT scans of both  
 208 patients with the array inserted ( $p < 0.05$ , FWE corrected). The fMRI results demonstrate that the  
 209 microelectrode arrays, indicated by the white crosshair, were indeed implanted close to the hotspot  
 210 of the disparity-related fMRI activations in LOC.

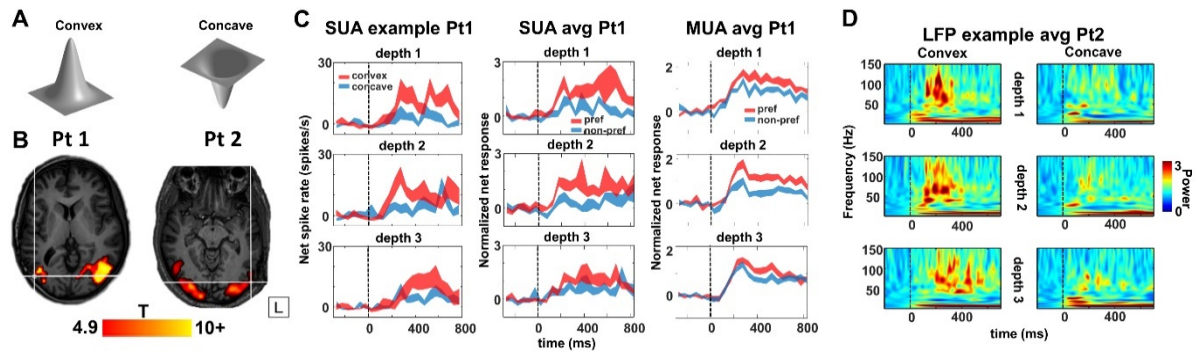

211

212 *Figure 6. Stereo experiment. A. Stimuli. B. T-values for main effects of stereo, contrast [curved*  
 213 *stereo + flat stereo] - [curved control + flat control], plotted on T1 weighted image.  $P < 0.05$ , FWE-*  
 214 *corrected for multiple comparisons. Crosshair indicates the position of the Utah-array. C. Example*  
 215 *single neuron (left column), average single-unit responses (middle column) and average multi-unit*  
 216 *responses (right column) to preferred (red) and nonpreferred (blue) curved surfaces at three positions*  
 217 *in depth (upper row: near, middle row: center and bottom row: far). D. Time-frequency power spectra,*  
 218 *for example channel in patient 1, for convex and concave stimulus presentations at three positions in*  
 219 *depth. This site is selective for convex shapes across different positions in depth.*

220

221 We recorded neural activity in LOC during the presentation of stereo stimuli (2 recording  
 222 sessions) while the patients were categorizing concave and convex surfaces (Fig 6A) at different  
 223 positions in depth (SUA on 52 channels in Pt 1). The example neuron in Figure 6C (left panel) preferred  
 224 convex over concave shapes at all three positions in depth (average  $d' = 0.73$ ), indicating 3D-structure  
 225 (i.e. higher-order disparity) selectivity. Notice that this neuron did not start to respond until 100 ms  
 226 after stimulus onset, and reached its peak activity only after 250 ms. In total, we recorded 39 visually  
 227 responsive single neurons in this test, 16 (41%) of which showed 3D-structure selectivity (i.e. a main  
 228 effect of *stereo* and/or a significant interaction between *stereo* and *position in depth* with no reversal  
 229 in selectivity (Verhoef et al., 2010)). For these 16 selective neurons, we plotted the average net

230 responses to the preferred and non-preferred 3D surfaces at each position in depth (Fig 6C middle  
231 panel). This population of LOC neurons preserved its selectivity at every position in depth, as did the  
232 MUA (N = 21 sites, right panel in Fig 6C). Similar to the example neuron in Figure 6C, the population  
233 (SUA and MUA combined) response latency (125 ms) and the latency of the 3D-structure selectivity  
234 (275 ms) were relatively long compared to previously-reported data obtained in the monkey ITC  
235 (Verhoef et al., 2012, Janssen et al., 2000b). Moreover, both patients showed significant 3D-structure-  
236 selective high gamma responses (15% of visually responsive channels in patient 1, 20% in patient 2,  
237 example channel in Figure 6D, average high-gamma of 3D-structure-selective sites is shown for both  
238 patients in Figure S3).

239 Not unlike the selectivity for image scrambling and for individual shapes, the high-gamma 3D-  
240 structure preference was highly localized on individual electrodes, since recording sites with a high  $d'$   
241 (convex versus concave) were frequently located next to recording sites with a very low  $d'$   
242 (Supplementary Fig. S4). A 2-way ANOVA with factors *neighboring channel* and *stereo* (convex or  
243 concave) indicated a significant clustering of the 3D-structure preference in the large majority of  
244 selective channels (94 and 97% of stereo-selective neurons with a main effect of *channel* in patients 1  
245 and 2, respectively, and with 2 and 5 channels, respectively, showing an interaction between channel  
246 and stereo in these two patients). Since the high-gamma response correlates with population spiking  
247 activity (Liu and Newsome, 2006, Premereur et al., 2012), these results indicate clustering of the 3D-  
248 structure preference in human LOC, consistent with previous findings in monkey ITC (Verhoef et al.,  
249 2012).

250

251

252

253

254

## 255 Discussion

256 We present the first report of intracortical recordings in SUA, MUA and LFP activity in human LOC  
257 using microelectrode arrays. Our 96-electrode array with an interelectrode spacing of 0.4 mm allowed  
258 extensive neuronal recordings in human visual cortex with an unprecedented spatiotemporal  
259 resolution. Our experiments confirm the robust sensitivity of LOC neurons to image scrambling, as  
260 predicted by fMRI, reveal significant 2D-shape and 3D-structure selectivities at the level of SUA, MUA  
261 and high-gamma responses, and provide the first RF maps of individual LOC neurons. Moreover, our  
262 data furnish new and crucial evidence concerning the microarchitecture of LOC, in that the shape  
263 preference differed drastically between neighboring electrodes spaced a mere 400 microns apart.

264 Our approach using a microelectrode array has several advantages compared to previous  
265 electrophysiological studies in humans. Subdural grids with contact points measuring several  
266 millimeters (Yoshor et al., 2007) sample neural activity over a wide area, whereas we used  
267 intracortical microelectrodes with sharp tips spaced just 400 microns apart, so that a single row of 10  
268 electrodes occupied a stretch of cortex measuring only 3.6 mm. Furthermore, the microelectrode  
269 array allowed us to simultaneously record neural activity on 96 microelectrodes, compared to  
270 recordings on only two microelectrodes in (Self et al., 2016). Finally, the spatial arrangement of the  
271 microelectrode array (10 by 10 electrodes) also allowed us to investigate the microarchitecture of  
272 human visual cortex at the scale of cortical columns. It should also be noted that our recording sites  
273 were located near the entry point of one of the depth electrodes and were, in retrospect, not part of  
274 the epileptogenic zone.

275 Ever since the original publication by (Kourtzi and Kanwisher, 2000), numerous studies have used  
276 the LOC localizer [intact shapes – scrambled shapes] to identify shape-sensitive regions in human  
277 visual cortex. However, the actual underlying neural selectivity has never been revealed. An extensive  
278 body of work has employed visual adaptation, observed via fMRI activation, as an indirect  
279 measurement of neuronal shape selectivity in humans (e.g. (Grill-Spector and Malach, 2001)), but the  
280 interpretation of these effects and their relation to neural selectivity at the single-cell level remain

281 controversial (Sawamura et al., 2006). Here, we not only confirmed the strong effect of image  
282 scrambling on SUA, MUA and high-gamma responses in LOC, but we also revealed significant response  
283 differences for intact shapes, i.e. shape selectivity, at the level of single neurons, as previously shown  
284 in the macaque ITC (Logothetis and Sheinberg, 1996, Tanaka, 1996). A bilateral lesion of LOC produces  
285 a profound deficit in shape recognition (Goodale et al., 1991, James et al., 2003, Westwood and  
286 Goodale, 2011), similar to ITC lesions in monkeys (Cowey and Gross, 1970, Britten et al., 1992, Dean,  
287 1976, Gross, 1994, Dean, 1979), and Transcranial Magnetic Stimulation over LO also impairs shape  
288 discrimination (Chouinard et al., 2017). Our data support the notion that these deficits arise from a  
289 loss of shape-selective neurons in LOC.

290 A substantial fraction of our MUA and LFP recording sites showed significant shape tuning –  
291 possibly as strong as in the monkey ITC (De Baene and Vogels, 2010) – indicating that shape preference  
292 may be localized within the LOC. In addition, the fixed arrangement of the microelectrodes, spaced  
293 400 microns apart, allowed assessing the spatial organization of sensitivity to image scrambling and  
294 of the shape selectivity at a high spatial resolution. Our observation that the shape preference  
295 changed markedly over the extent of 400 microns is in line with previous studies in the macaque ITC  
296 demonstrating considerable clustering for shape features. Fujita et al ((Fujita et al., 1992)) showed  
297 that ITC neurons with similar shape selectivities are organized vertically across the cortical thickness,  
298 and (Tsunoda et al., 2001) used intrinsic optical imaging to highlight patches of activation elicited by  
299 specific object images spaced 0.4 to 0.8 mm apart. Thus, our results are highly consistent with previous  
300 studies in the ITC of macaque monkeys.

301 The spatially-restricted nature of high-gamma responses we measured in LOC is consistent with  
302 previous studies in visual cortex indicating that the higher frequency bands of the LFP signal  
303 correspond with MUA (Goense and Logothetis, 2008, Liu and Newsome, 2006, Logothetis et al., 2001,  
304 Premereur et al., 2012) and originate from a small region of cortex measuring a few hundred microns  
305 in extent (Katzner et al., 2009). However, studies in auditory cortex reported considerable volume  
306 conduction – even in the high-gamma band of the LFP signal – over several millimeters of cortex



307 (Kajikawa and Schroeder, 2011). Although our data do not allow us to fully resolve this controversy, it  
308 should be noted that our spatially-selective recordings were obtained during an active fixation task,  
309 where no influence of anesthetics was possible, in contrast to the Kajikawa and Schroeder study. It  
310 should also be noted that although we recorded SUA in one patient, we were able to confirm our  
311 findings with MUA and high-gamma responses in both patients.

312 Our data also shed light on the RF properties of LOC neurons. Although we did not obtain sufficient  
313 data for an exhaustive RF description, a few conclusions seem to be warranted. The average RF size in  
314 LOC was large (473 deg<sup>2</sup>), and a considerable fraction of LOC neurons responded to stimuli presented  
315 in the ipsilateral hemifield. A previous study in human early visual cortex reported that the RF  
316 measured with high-gamma responses is even more restricted than that measured with MUA (Self et  
317 al., 2016). Thus, our observation that LOC sites frequently exhibit bilateral SUA, MUA and high-gamma  
318 responses is interesting in view of the comparison between the human LOC and monkey ITC areas  
319 (see below). Future studies will have to investigate the RF profile of LOC neurons in more detail.

320 To our knowledge, we also provide the first evidence for 3D-structure selectivity defined by  
321 binocular disparity in human visual cortex. A number of recording sites showed differential responses  
322 to convex and concave surfaces (composed of the same monocular images), across different positions  
323 in depth, indicative of higher-order disparity or 3D-structure selectivity. Similar to the selectivity for  
324 image scrambling and that for individual shapes, the 3D-structure preference was highly localized on  
325 individual electrodes, since recording sites with strong selectivity were frequently located next to  
326 recording sites with a very low selectivity. A large number of studies (Janssen et al., 2001, Janssen et  
327 al., 2003, Janssen et al., 1999, Janssen et al., 2000b, Janssen et al., 2000a, Yamane et al., 2008) have  
328 investigated 3D-structure selectivity in the macaque anterior ITC (area TE). More recently, Verhoef et  
329 al. showed clustering of the MUA selectivity for 3D structure in area TE using identical stimuli (Verhoef  
330 et al., 2012), and microstimulation of these clusters could predictably alter the perceptual report of  
331 the animal in a 3D-structure categorization task. Hence, the 3D-structure selectivity we observe here  
332 has also been described in the macaque ITC. Moreover, patient DF (Read et al., 2010), who suffered

333 bilateral damage to LOC, was impaired in using the relative disparity between features at different  
334 locations, although 3D-structure categorization was not tested.

335 One major, outstanding question relates to the possible homologies between the different  
336 subparts of human LOC and monkey ITC areas TEO and TE (Orban et al., 2014). Although a single study  
337 cannot resolve this homology question, several observations we made are highly relevant in this  
338 respect. Shape-selective responses can be observed in TEO and in TE. However, the robust 3D-  
339 structure selectivity we observed was previously described in the more anterior part of area TE in  
340 macaques (Janssen et al., 2000b), but is virtually absent in macaque area TEO (Alizadeh et al., 2018).  
341 Moreover, the large and frequently bilateral RFs we observed in human LOC are more consistent with  
342 TE than with TEO (Hikosaka, 1999). Detailed mapping of receptive fields (Boussaoud et al., 1991,  
343 Kobatake and Tanaka, 1994) and stimulus reduction during single-unit recordings (Tanaka et al., 1991)  
344 will clarify in greater detail the relationship between this part of the LOC and the monkey ITC areas.

345 Overall, the similarities between the human LOC and the (more anterior part of) monkey ITC were  
346 very apparent. In both species, neurons are sensitive to image scrambling (Vogels, 1999) and shape-  
347 selective; shape preference is clustered; the RFs are large and include the fovea (Op de Beeck et al.,  
348 2001), and neurons preserve their 3D structure preferences across position in depth (Janssen et al.,  
349 2000b). The only possible discrepancy between our results in the human LOC and previous studies in  
350 monkey ITC may reside in the latencies of the neuronal response. When tested with images of objects,  
351 the MUA became selective only after 125 ms, and the response and selectivity latency for 3D stimuli  
352 equaled 125 and 225 ms, respectively. In contrast, macaque ITC neurons can signal shape differences  
353 starting at 70-80 ms after stimulus onset and at 80-100 ms for 3D stimuli (Janssen et al., 2000b)).  
354 However, our results are in line with previous studies in the human medial temporal lobe – which is  
355 downstream from LOC – reporting latencies of 300 ms (Quiroga et al., 2005, Kreiman et al., 2000b).  
356 However, neuronal latencies are highly influenced by the number of stimulus repetitions, therefore a  
357 higher number of selective recording sites and a higher number of trials may have yielded shorter

358 latencies in our experiments. More detailed measurements in the two species in areas where the  
359 homology is clearly established (e.g. V1) are undoubtedly necessary.

360

## 361 **Materials and Methods**

362 Two patients (Pt2, 28 y.o. female; Pt1, 44 y.o. male) with refractory epilepsy underwent invasive  
363 intracranial recordings with the use of depth electrodes to delineate the epileptogenic zone. During  
364 this procedure microelectrode arrays were implanted in the left (patient 1) and right (patient 2) lateral  
365 occipital complex. Informed consent from the patients and local ethical board approval was obtained  
366 for this procedure (study protocol S 53126).

367

### 368 fMRI

#### 369 *Stimuli*

370 The stimuli were projected from a liquid crystal display projector (Barco Reality 6400i, 1024 x 768  
371 pixels, 60-Hz refresh rate) onto a translucent screen positioned in the bore of the magnet (57 cm  
372 distance). The patients viewed the stimuli through a mirror tilted at 45° and attached to the head coil.

373 *LO Localizer*: The LO localizer stimuli were images measuring 300 × 300 pixels. We used grayscale  
374 images and line drawings of familiar objects (20 images and 20 line drawings), as well as scrambled  
375 versions of each set (Fig. 1A) (Kourtzi et al., 2003). The scrambled images were created by dividing the  
376 intact images into a 20 × 20 square grid and randomizing the positions of each of the resulting squares.  
377 The grid lines were present in both the intact and the scrambled images. The overall size of the stimuli  
378 measured 7° in visual angle and each stimulus was presented for 1000 ms.

379 *Stereo Localizer*: The stimulus set consisted of random-dot stereograms in which the depth was  
380 defined by horizontal disparity (dot size 0.08°, dot density 50%, vertical extent 5.5°), and were  
381 presented on a gray background. All stimuli were generated using MATLAB (R2010a, MathWorks) and  
382 were gamma-corrected. We used a 2 by 2 design with factors *curvature* (curved vs flat) and *disparity*

383 (stereo vs control), as described in (Durand et al., 2007, Joly et al., 2009, Van Dromme et al., 2016, Van  
384 Dromme et al., 2015). The stereo-curved condition consisted of three types of smoothly-curved depth  
385 profiles (1, 1/2, or 1/4 vertical sinusoidal cycle) together with their antiphase counterparts obtained  
386 by interchanging the right and left monocular images (disparity amplitude within the surface: 0.5°).  
387 Each of the six depth profiles was combined with one of four different circumference shapes and  
388 appeared at two different positions in depth (mean disparity + or - 0.5°), creating a set of 48 curved  
389 surfaces. In the stereo-flat condition, flat surfaces (using the same four circumference shapes) were  
390 presented at 12 different positions in depth, such that the disparity content (the sum of all disparities)  
391 was identical to that in the stereo curved condition. Finally, the control conditions (stereo-control and  
392 flat-control) consisted of the presentation of one of the monocular images (either belonging to one of  
393 the stereo-curved stimuli or to one of the stereo-flat stimuli) to both eyes simultaneously. Each control  
394 condition consisted of exactly the same monocular images as the corresponding stereo condition,  
395 hence the binocular input was identical in the stereo conditions and in the control conditions. The  
396 overall size of the stimuli measured 5.6° in visual angle and each stimulus was presented for 1000 ms.  
397 Dichoptic presentation of the stimuli was achieved by means of red/green filter stereo glasses worn  
398 by the patient.

399

#### 400 *Data collection*

401 Scanning was performed on a 3-T MR scanner (Achieva dstream, Philips Medical Systems, Best, The  
402 Netherlands) located at the University Hospitals Leuven. Functional images were acquired using  
403 gradient-echoplanar imaging with the following parameters: 52 horizontal slices (2 mm slice thickness;  
404 0.2 mm gap; multiband acquisition), repetition time (TR) 2 s, time of echo (TE): 30 ms, flip angle: 90°,  
405 112 \* 112 matrix with 2 x2 mm in-plane resolution, and sensitivity-enhancing (SENSE) reduction factor  
406 of 2. The 25 slices of a volume covered the entire brain from the cerebellum to the vertex. A three-  
407 dimensional (3D) high-resolution (18181.2) T1-weighted image covering the entire brain was acquired

408 in the beginning of the scanning session and used for anatomical reference (TE/TR 4.6/9.7 ms;  
409 inversion time, 900 ms; slice thickness, 1.2 mm; 256 \* 256 matrix; 182 coronal slices; SENSE reduction  
410 factor 2.5). The single scanning session lasted 60 min.

411 *CT*: A computed tomography (CT) scan (Siemens, 1mm slice thickness, 120kV, Dose length product of  
412 819mGy.cm) was performed two hours after electrode placement to verify the location of the  
413 microelectrode array.

414 *LO Localizer*: Stimuli (shapes, line stimuli, scrambled shapes, scrambled line stimuli, fixation only, Fig.  
415 1A) were presented in blocks of 24 s except for the fixation condition (20 s), each block was repeated  
416 4 times in a run, creating runs of 464 s. Individual stimuli were presented for 1000 ms (ISI=0; fixation  
417 time: 200 ms).

418 *Stereo Localizer*: Stimuli (curved stereo, flat stereo, curved control, flat control, fixation only, Fig. 1B)  
419 were presented in blocks of 24 s, and each block was repeated 4 times in a run, creating runs of 480  
420 s. Individual stimuli were presented for 1000 ms (interstimulus interval = 0 ms; fixation time = 200  
421 ms). 12 functional volumes were acquired for every block (or condition, each 24 s long) and these  
422 were embedded in a time series of 222 volumes (444 s).

423

#### 424 *Data analysis*

425 Data analysis was performed using the SPM12 software package (Wellcome Department of Cognitive  
426 Neurology, London, UK) running under MATLAB (The Mathworks, Natick, MA). The preprocessing  
427 steps involved 1) realignment of the images, 2) coregistration of the anatomical image and the mean  
428 functional image. Before further analysis, the functional data were smoothed with an isotropic  
429 Gaussian kernel of 5 mm. To determine the exact location of the Utah array, the CT scan was  
430 coregistered with the anatomical image using SPM12 software.

431 *LO Localizer*: To localize areas responding more strongly to the presentation of objects versus  
432 scrambled controls, we calculated the contrast [shapes + outlines] - [scrambled shapes +scrambled  
433 outlines], at  $p < 0.05$ , FWE corrected.

434 *Stereo*: To identify regions sensitive to binocular disparity, we calculated the main effect of *stereo*:  
435 [curved stereo + flat stereo] - [curved control + flat control], at  $p < 0.05$ , FWE corrected.

#### 436 Electrophysiology

437 We implanted a 96-channel microelectrode array with 1.5 mm electrode length in patient 1 and with  
438 1 mm electrode length in patient 2; electrode spacing measured 400 microns (4 x 4 mm; Blackrock  
439 Microsystems, UT, USA). The array was implanted through a burr hole over the occipitotemporal  
440 cortex, used for depth electrode placement, according to the manufacturer's protocol with a  
441 pressurized inserter wand. These microelectrodes were used clinically for advanced epilepsy  
442 monitoring (study protocol S 53126).

443

#### 444 *Stimuli*

445 All stimuli were presented by means of a custom-made stereoscope. Images from two LCD monitors  
446 were presented to the two eyes with the use of customized mirrors at a viewing distance of 56 cm (1  
447 pixel =  $0.028^\circ$ ). Continuous eye-movement tracking (left eye, 120Hz; ISCAN, MA, USA), ensuring  
448 fixation in an electronically defined window (3\*3 degrees), was performed throughout the  
449 experiment. Trials in which the patients did not maintain fixation were aborted.

450 *LO Localizer*: The same stimulus set as in the fMRI experiment was used. The the stimuli presented in  
451 the stereoscope were 8.5 deg in size. After a brief period of fixation (200 ms), the stimulus was  
452 presented for 500 ms, followed by an interstimulus interval of 100 ms. In the LO localizer, no disparity  
453 was present in the stimuli.

454 *Receptive field mapping*: To map the RF, a single non-scrambled shape (8.5 deg) was presented at 25  
455 different positions in the visual field, covering 50 degrees horizontally and 30 degrees vertically, during  
456 passive fixation.



457 *Stereo test:* We presented concave and convex surfaces at three different positions in depth (near, at  
458 the fixation plane, and far, Fig. 1C) at the fixation point while monitoring the position of the left eye.  
459 To avoid monocular depth cues, the disparity (disparity amplitude: 0.25 deg) varied only along the  
460 surface of the shape, while the circumference of the shape was kept at a constant disparity (+0.25  
461 deg, 0 deg or -0.25 deg disparity), as in (Verhoef et al., 2010, Verhoef et al., 2012). The patients had  
462 to categorize the 3D structure of the stimulus (concave or convex, 100% disparity coherence)  
463 independently of the position in depth by means of a button press after stimulus offset (1000 ms of  
464 stimulus presentation time), as in (Verhoef et al., 2010). An auditory tone provided feedback after  
465 every successfully completed trial. Both patients performed at more than 90% correct.

466

#### 467 *Data Collection*

468 Data were collected using a digital headstage (Blackrock Microsystems, UT, USA) connected to a 128-  
469 channel neural signal processor (Blackrock Microsystems, UT, USA). For LFP recordings, the signal was  
470 filtered with a digital low-pass filter of 125 Hz, and LFP signals were recorded continuously (sampling  
471 frequency: 1000 Hz). Single- and multi-unit signals were high-pass filtered (750 Hz). A multi-unit  
472 detection trigger was set at a level of 95% of the signal's noise. All spike sorting was performed offline  
473 (Offline Sorter 4, Plexon, TX, USA).

474

#### 475 *Data analysis*

476 Data analysis was performed using custom-written Matlab (the MathWorks, MA, USA) software.

477 *Spike rate analysis:* For every channel, we calculated the net spike rate by subtracting the  
478 average baseline activity from the spike rate. Spike rate was further normalized by dividing the net  
479 spike rates by the average spike rate for the best condition (50-300 ms after stimulus onset) for each  
480 channel. Statistics were performed using permutation tests, where real data were randomly  
481 distributed over all the different conditions 1000 times. The differences between two conditions were  
482 calculated for every permutation, and compared with the actual difference between conditions. The

483 latency of the spiking activity for visually-responsive channels was defined as the first of two  
484 consecutive 50 ms bins with a spike rate higher than the average baseline plus 2 standard errors. The  
485 selectivity latency was defined as the first of two consecutive 50 ms bins with a spike rate for the  
486 preferred condition higher than the average spike rate for the non-preferred condition plus 2 standard  
487 errors.

488 *LFP analysis:* For every trial, the time-frequency power spectrum was calculated using Morlet's  
489 wavelet analysis techniques (Tallon-Baudry and Bertrand, 1999), with a spectro-temporal resolution  
490 equal to 7, after filtering with a 50 Hz notch filter (FieldTrip Toolbox, Donders Institute, The  
491 Netherlands (Oostenveld et al., 2011)). This method provides a better compromise between time and  
492 frequency resolution compared to methods using Fourier transforms (Sinkkonen et al., 1995, Tallon-  
493 Baudry et al., 1997). To remove any filter artifacts at the beginning and end of the trial, the first and  
494 last 100 ms of each trial were discarded. Power was normalized per trial by dividing the power trace  
495 per frequency by the average power for this frequency in the 100 ms interval before stimulus onset.  
496 To exclude trials containing possible artifacts in the LFP recordings, maximum values of the continuous  
497 LFP signal were determined and trials with maximum values above the 95<sup>th</sup> percentile were removed.  
498 Furthermore, the data set was split in two, and all population analyses were repeated for both halves  
499 of the data independently, to check for consistency. We analyzed the LFP power in the high frequency  
500 bands (high-gamma): 80-120 Hz. Lowest frequencies had to be excluded from our analyses, as our  
501 trials were maximally 1 s long. All statistics on LFP data were obtained using permutation tests as  
502 described for spiking activity. The latency of the LFP response per frequency band was defined as the  
503 first of five consecutive timestamps (in ms) in which the average power minus 2 standard errors was  
504 higher than 1 (= average power of the normalized baseline). The LFP-latency for selectivity between  
505 conditions was defined as the first of two consecutive samples in which the average power for  
506 condition *A* minus 2 standard errors was higher than the average power for condition *B*.

507 *D-prime:*  $d'$  statistics were calculated as:

508 
$$d' = (\mu_{\text{Pref}} - \mu_{\text{NonPref}}) / \sigma$$

509 Here  $\mu_{\text{Pref}}$  and  $\mu_{\text{NonPref}}$  denote the mean responses to the preferred and the non-preferred condition  
510 (e.g. non-scrambled versus scrambled), respectively, and

511 
$$\sigma = \sqrt{(\sigma_{\text{Pref}}^2 + \sigma_{\text{NonPref}}^2) / 2}$$

512 is the pooled variance of the two response distributions. This measure differs from those used  
513 in previous studies (Frien and Eckhorn, 2000, Frien et al., 2000, Liu and Newsome, 2006) in that it  
514 explicitly takes into account the trial-by-trial variability of the response (Siegel and Konig, 2003).

515 To estimate the spatial extent of selectivity observed in the MUA and high-gamma band over  
516 the array, we determined for each visually responsive channel its immediate neighbors (i.e. either 8  
517 channels, for recording channels which were not located on the edge of the array, or 5 channels for  
518 edge electrodes). We calculated a two-way ANOVA with factors *scrambling* (scrambled vs non-  
519 scrambled) and *position* for each channel individually. Significance was tested using a p-value of 0.05.

520 *Ranking:* To investigate the MUA and high-gamma responses to individual stimuli, we applied  
521 a ranking technique in which individual non-scrambled stimuli were ranked based on the electrode's  
522 average spiking activity and high-gamma power evoked by the stimuli, then the same ranking was  
523 applied to the individual scrambled control stimuli. To investigate differences between rankings, a  
524 linear regression was performed, and a 95% confidence interval was used to determine significant  
525 differences between regression coefficients or intercepts. Finally, the same ranking technique was  
526 used to investigate the spatial specificity of the shape selectivity: we ranked the non-scrambled stimuli  
527 for each electrode based on the spiking activity and high-gamma responses, and this same ranking  
528 was then applied to the responses of all neighboring channels separately. We then averaged the spike  
529 rate and gamma responses for the ranked data of the neighboring channels to determine whether the  
530 shape preference was preserved at neighboring channels. Differences in ranking were investigated  
531 using a linear fit as described above.

532            *Receptive fields.* The average single-unit activity and high gamma power were calculated  
533 during stimulus presentation for each stimulus-position, and filtered with a Gaussian (sigma: 0.5).  
534 To calculate receptive field size, we constructed RF maps by interpolating the neuronal responses  
535 between all positions tested across the 50\*30 degrees display area, and then calculating the number  
536 of pixels in the RF map with a response higher than 50% of the maximum response.

537 **Supplementary Information**

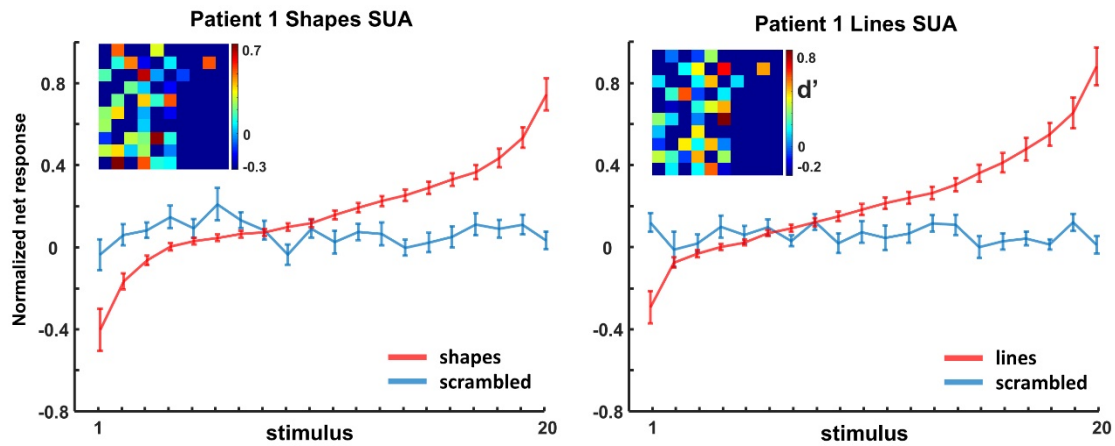

538

539 *Figure S1. Ranking analyses of shapes and lines for single-unit activity (SUA) in patient 1. The same*  
540 *ranking is applied for the corresponding scrambled control stimuli.*

541

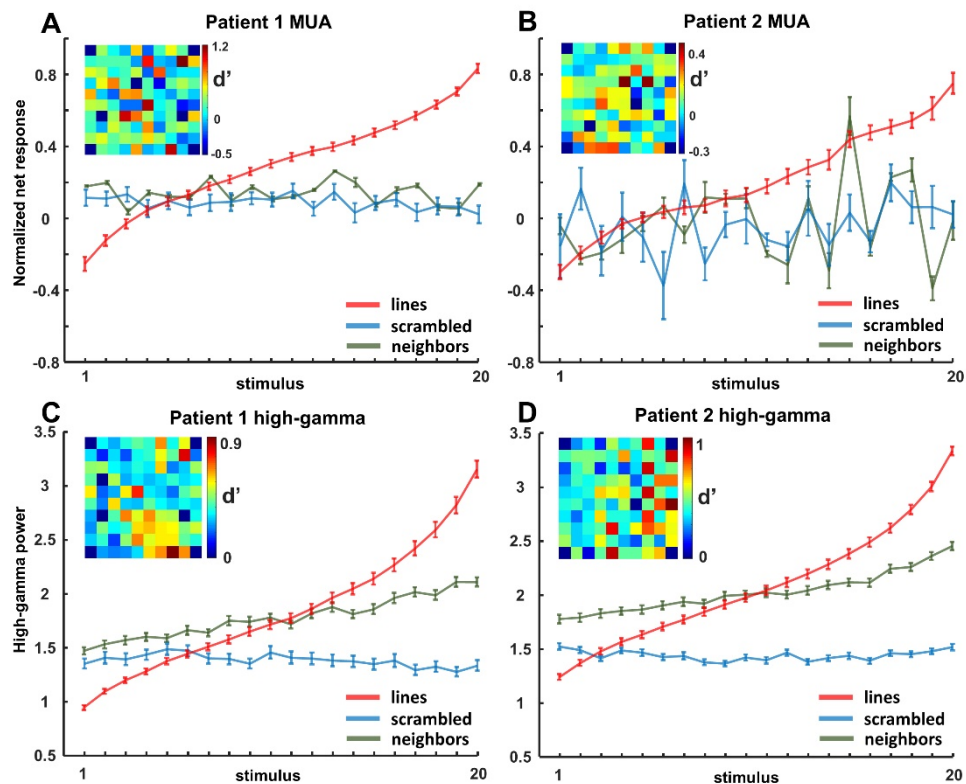

542

543 *Figure S2. Ranking of lines for multi-unit activity (MUA) and high-gamma LFP for both patients. The*  
544 *same ranking is applied for the neighboring channels and the corresponding scrambled control*  
545 *stimuli.*

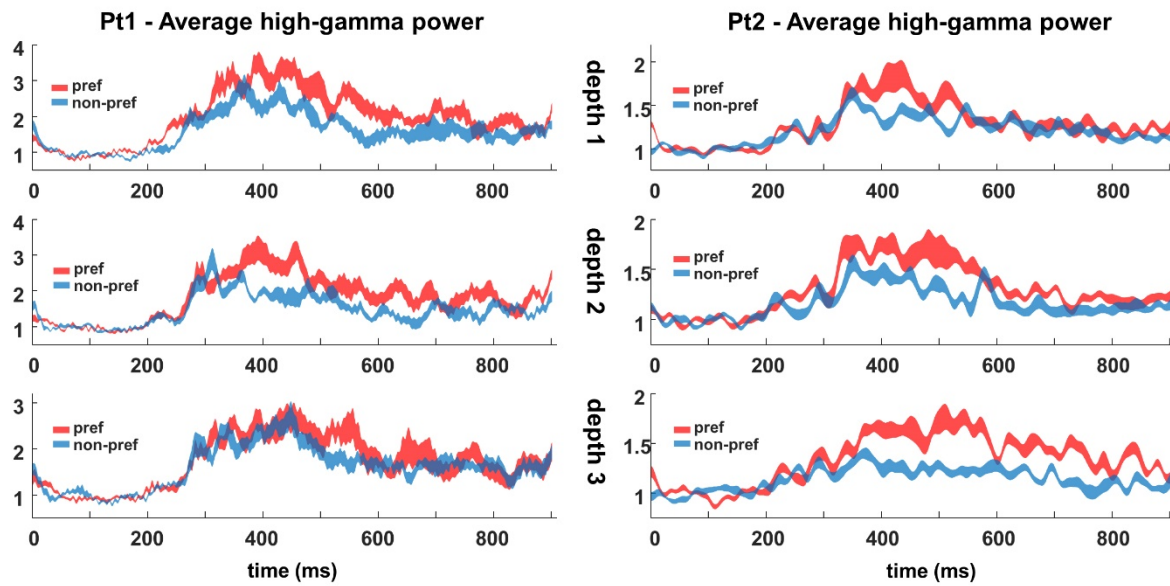

546

547 *Figure S3. Average high-gamma of 3D-structure-selective sites for each patient. Preferred vs non-*  
548 *preferred shapes.*

549

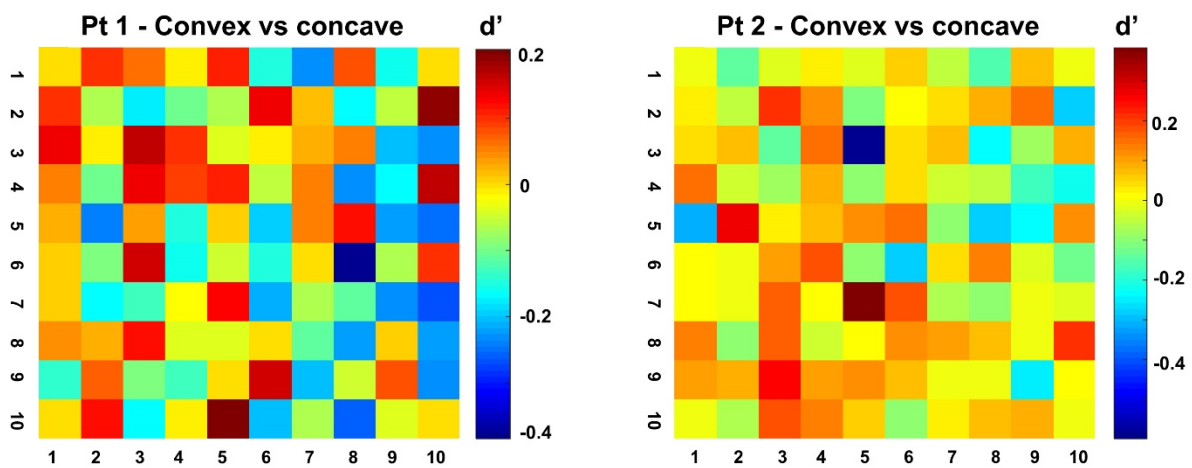

550

551 *Figure S4.  $d'$  values of high-gamma responses for the two patients across the array. High-gamma 3D-*  
552 *structure preference was highly localized on individual electrodes, since recording sites with a high  $d'$*   
553 *(convex versus concave) were frequently located next to recording sites with a low  $d'$ .*

554



|                                       | Patient 1                     |                                |                                | Patient 2                     |                               |
|---------------------------------------|-------------------------------|--------------------------------|--------------------------------|-------------------------------|-------------------------------|
|                                       | <i>SUA</i>                    | <i>MUA</i>                     | <i>LFP</i>                     | <i>MUA</i>                    | <i>LFP</i>                    |
| <b>Shapes</b>                         | 0.0404<br>(0.0337, 0.047)     | 0.049<br>(0.0448, 0.0531)      | 0.1015<br>(0.0932, 0.1097)     | 0.0623<br>(0.0561, 0.0685)    | 0.0892<br>(0.0834, 0.095)     |
| <b>Applied ranking for scr_shapes</b> | -0.0008*<br>(-0.0058, 0.0042) | -0.0026*<br>(-0.0064, 0.0011)  | -0.0077*<br>(-0.0129, -0.0026) | -0.0005*<br>(-0.0098, 0.0087) | 0.0002*<br>(-0.0027, 0.0031)  |
| <b>Applied ranking for neighbors</b>  | /                             | 0.0072*<br>(0.0043 - 0.0101)   | 0.041*<br>(0.0362 - 0.0458)    | 0.0082*<br>(0.001 - 0.0153)   | 0.0285*<br>(0.026 - 0.0309)   |
| <b>Lines</b>                          | 0.0443<br>(0.038, 0.0507)     | 0.0468<br>(0.0431, 0.0505)     | 0.0974<br>(0.0867, 0.108)      | 0.0469<br>(0.0432, 0.0506)    | 0.0919<br>(0.082, 0.1018)     |
| <b>Applied ranking for scr_lines</b>  | -0.0009*<br>(-0.289, -0.0047) | 0.1483*<br>(-0.0028, -0.0056)  | -0.0059*<br>(-0.0094, -0.0024) | 0.0073*<br>(-0.0047, 0.0194)  | -0.0005*<br>(-0.0043, 0.0034) |
| <b>Applied ranking for neighbors</b>  | /                             | -0.0006*<br>(-0.0057 - 0.0045) | 0.0312*<br>(0.0279 - 0.0346)   | 0.0007*<br>(-0.0116 - 0.0256) | 0.0305*<br>(0.0262 - 0.0347)  |

555

556 *Table S1. Slope of regression lines with 95% confidence interval for shapes and lines. The same*  
557 *ranking was applied for the scrambled versions of the stimuli and for their neighboring channels*  
558 *respectively. \* Indicates significant ranking difference.*

559 **Acknowledgments**

560 We thank Stijn Verstraeten, Piet Kayenbergh, Gerrit Meulemans, Marc De Paep, Anaïs Van Hoylandt,  
561 Ron Peeters and Evy Cleeren for technical assistance. We thank Astrid Hermans and Sara De Pril for  
562 administrative support.

563

564 This work was supported by Fonds Wetenschappelijk onderzoek (FWO) and Odysseus grant. T.T. is  
565 supported by FWO (senior clinical researcher, FWO 1830717N).

566

567 **Declaration of Interests**

568 The authors declare no competing interests

569

570

571       **References**

572

- 573 AFLALO, T., KELLIS, S., KLAES, C., LEE, B., SHI, Y., PEJSA, K., SHANFIELD, K., HAYES-JACKSON, S., AISEN,  
574 M., HECK, C., et al. 2015. Neurophysiology. Decoding motor imagery from the posterior  
575 parietal cortex of a tetraplegic human. *Science*, 348, 906-10.
- 576 ALIZADEH, A. M., VAN DROMME, I. C. & JANSSEN, P. 2018. Single-cell responses to three-dimensional  
577 structure in a functionally defined patch in macaque area TEO. *J Neurophysiol*, 120, 2806-  
578 2818.
- 579 ALLISON, T., PUCE, A., SPENCER, D. D. & MCCARTHY, G. 1999. Electrophysiological studies of human  
580 face perception. I: Potentials generated in occipitotemporal cortex by face and non-face  
581 stimuli. *Cereb Cortex*, 9, 415-30.
- 582 ARROYO, S., LESSER, R. P., GORDON, B., UEMATSU, S., JACKSON, D. & WEBBER, R. 1993. Functional  
583 significance of the mu rhythm of human cortex: an electrophysiologic study with subdural  
584 electrodes. *Electroencephalogr Clin Neurophysiol*, 87, 76-87.
- 585 BOUSSAOU, D., DESIMONE, R. & UNGERLEIDER, L. G. 1991. Visual topography of area TEO in the  
586 macaque. *J Comp Neurol*, 306, 554-75.
- 587 BRITTEN, K. H., NEWSOME, W. T. & SAUNDERS, R. C. 1992. Effects of inferotemporal cortex lesions on  
588 form-from-motion discrimination in monkeys. *Exp Brain Res*, 88, 292-302.
- 589 CHOUINARD, P. A., MEENA, D. K., WHITWELL, R. L., HILCHEY, M. D. & GOODALE, M. A. 2017. A TMS  
590 Investigation on the Role of Lateral Occipital Complex and Caudal Intraparietal Sulcus in the  
591 Perception of Object Form and Orientation. *J Cogn Neurosci*, 29, 881-895.
- 592 COWEY, A. & GROSS, C. G. 1970. Effects of foveal prestriate and inferotemporal lesions on visual  
593 discrimination by rhesus monkeys. *Exp Brain Res*, 11, 128-44.
- 594 DE BAENE, W. & VOGELS, R. 2010. Effects of adaptation on the stimulus selectivity of macaque inferior  
595 temporal spiking activity and local field potentials. *Cereb Cortex*, 20, 2145-65.
- 596 DEAN, P. 1976. Effects of inferotemporal lesions on the behavior of monkeys. *Psychol Bull*, 83, 41-71.
- 597 DEAN, P. 1979. Visual cortex ablation and thresholds for successively presented stimuli in rhesus  
598 monkeys: II. Hue. *Exp Brain Res*, 35, 69-83.
- 599 DURAND, J. B., NELISSEN, K., JOLY, O., WARDAK, C., TODD, J. T., NORMAN, J. F., JANSSEN, P.,  
600 VANDUFFEL, W. & ORBAN, G. A. 2007. Anterior regions of monkey parietal cortex process  
601 visual 3D shape. *Neuron*, 55, 493-505.
- 602 FRIED, I., MACDONALD, K. A. & WILSON, C. L. 1997. Single neuron activity in human hippocampus and  
603 amygdala during recognition of faces and objects. *Neuron*, 18, 753-65.
- 604 FRIEN, A. & ECKHORN, R. 2000. Functional coupling shows stronger stimulus dependency for fast  
605 oscillations than for low-frequency components in striate cortex of awake monkey. *Eur J*  
606 *Neurosci*, 12, 1466-78.
- 607 FRIEN, A., ECKHORN, R., BAUER, R., WOELBERN, T. & GABRIEL, A. 2000. Fast oscillations display sharper  
608 orientation tuning than slower components of the same recordings in striate cortex of the  
609 awake monkey. *Eur J Neurosci*, 12, 1453-65.
- 610 FUJITA, I., TANAKA, K., ITO, M. & CHENG, K. 1992. Columns for visual features of objects in monkey  
611 inferotemporal cortex. *Nature*, 360, 343-6.
- 612 GEORGIEVA, S. S., TODD, J. T., PEETERS, R. & ORBAN, G. A. 2008. The extraction of 3D shape from  
613 texture and shading in the human brain. *Cereb Cortex*, 18, 2416-38.
- 614 GOENSE, J. B. & LOGOTHETIS, N. K. 2008. Neurophysiology of the BOLD fMRI signal in awake monkeys.  
615 *Curr Biol*, 18, 631-40.
- 616 GONCALVES, N. R., BAN, H., SANCHEZ-PANCHUELO, R. M., FRANCIS, S. T., SCHLUPPECK, D. &  
617 WELCHMAN, A. E. 2015. 7 tesla FMRI reveals systematic functional organization for binocular  
618 disparity in dorsal visual cortex. *J Neurosci*, 35, 3056-72.

- 619 GOODALE, M. A., MILNER, A. D., JAKOBSON, L. S. & CAREY, D. P. 1991. A neurological dissociation  
620 between perceiving objects and grasping them. *Nature*, 349, 154-6.
- 621 GRILL-SPECTOR, K. & MALACH, R. 2001. fMR-adaptation: a tool for studying the functional properties  
622 of human cortical neurons. *Acta Psychol (Amst)*, 107, 293-321.
- 623 GROSS, C. G. 1994. How inferior temporal cortex became a visual area. *Cereb Cortex*, 4, 455-69.
- 624 HIKOSAKA, K. 1999. Tolerances of responses to visual patterns in neurons of the posterior  
625 inferotemporal cortex in the macaque against changing stimulus size and orientation, and  
626 deleting patterns. *Behav Brain Res*, 100, 67-76.
- 627 JAMES, T. W., CULHAM, J., HUMPHREY, G. K., MILNER, A. D. & GOODALE, M. A. 2003. Ventral occipital  
628 lesions impair object recognition but not object-directed grasping: an fMRI study. *Brain*, 126,  
629 2463-75.
- 630 JANSSEN, P., VOGELS, R., LIU, Y. & ORBAN, G. A. 2001. Macaque inferior temporal neurons are  
631 selective for three-dimensional boundaries and surfaces. *J Neurosci*, 21, 9419-29.
- 632 JANSSEN, P., VOGELS, R., LIU, Y. & ORBAN, G. A. 2003. At least at the level of inferior temporal cortex,  
633 the stereo correspondence problem is solved. *Neuron*, 37, 693-701.
- 634 JANSSEN, P., VOGELS, R. & ORBAN, G. A. 1999. Macaque inferior temporal neurons are selective for  
635 disparity-defined three-dimensional shapes. *Proc Natl Acad Sci U S A*, 96, 8217-22.
- 636 JANSSEN, P., VOGELS, R. & ORBAN, G. A. 2000a. Selectivity for 3D shape that reveals distinct areas  
637 within macaque inferior temporal cortex. *Science*, 288, 2054-6.
- 638 JANSSEN, P., VOGELS, R. & ORBAN, G. A. 2000b. Three-dimensional shape coding in inferior temporal  
639 cortex. *Neuron*, 27, 385-97.
- 640 JOLY, O., VANDUFFEL, W. & ORBAN, G. A. 2009. The monkey ventral premotor cortex processes 3D  
641 shape from disparity. *Neuroimage*, 47, 262-72.
- 642 KAJIKAWA, Y. & SCHROEDER, C. E. 2011. How local is the local field potential? *Neuron*, 72, 847-58.
- 643 KATZNER, S., NAUHAUS, I., BENUCCI, A., BONIN, V., RINGACH, D. L. & CARANDINI, M. 2009. Local origin  
644 of field potentials in visual cortex. *Neuron*, 61, 35-41.
- 645 KOBATAKE, E. & TANAKA, K. 1994. Neuronal selectivities to complex object features in the ventral  
646 visual pathway of the macaque cerebral cortex. *J Neurophysiol*, 71, 856-67.
- 647 KOURTZI, Z., ERB, M., GRODD, W. & BULTHOFF, H. H. 2003. Representation of the perceived 3-D object  
648 shape in the human lateral occipital complex. *Cereb Cortex*, 13, 911-20.
- 649 KOURTZI, Z. & KANWISHER, N. 2000. Cortical regions involved in perceiving object shape. *J Neurosci*,  
650 20, 3310-8.
- 651 KREIMAN, G., FRIED, I. & KOCH, C. 2002. Single-neuron correlates of subjective vision in the human  
652 medial temporal lobe. *Proc Natl Acad Sci U S A*, 99, 8378-83.
- 653 KREIMAN, G., KOCH, C. & FRIED, I. 2000a. Category-specific visual responses of single neurons in the  
654 human medial temporal lobe. *Nat Neurosci*, 3, 946-53.
- 655 KREIMAN, G., KOCH, C. & FRIED, I. 2000b. Imagery neurons in the human brain. *Nature*, 408, 357-61.
- 656 LIU, J. & NEWSOME, W. T. 2006. Local field potential in cortical area MT: stimulus tuning and  
657 behavioral correlations. *J Neurosci*, 26, 7779-90.
- 658 LOGOTHETIS, N. K., PAULS, J., AUGATH, M., TRINATH, T. & OELTERMANN, A. 2001. Neurophysiological  
659 investigation of the basis of the fMRI signal. *Nature*, 412, 150-7.
- 660 LOGOTHETIS, N. K. & SHEINBERG, D. L. 1996. Visual object recognition. *Annu Rev Neurosci*, 19, 577-  
661 621.
- 662 MOORE, C. & ENGEL, S. A. 2001. Neural response to perception of volume in the lateral occipital  
663 complex. *Neuron*, 29, 277-86.
- 664 OOSTENVELD, R., FRIES, P., MARIS, E. & SCHOFFELLEN, J. M. 2011. FieldTrip: Open source software for  
665 advanced analysis of MEG, EEG, and invasive electrophysiological data. *Comput Intell*  
666 *Neurosci*, 2011, 156869.
- 667 OP DE BEECK, H., WAGEMANS, J. & VOGELS, R. 2001. Inferotemporal neurons represent low-  
668 dimensional configurations of parameterized shapes. *Nat Neurosci*, 4, 1244-52.

- 669 ORBAN, G. A., ZHU, Q. & VANDUFFEL, W. 2014. The transition in the ventral stream from feature to  
670 real-world entity representations. *Front Psychol*, 5, 695.
- 671 PREMEREUR, E., VANDUFFEL, W. & JANSSEN, P. 2012. Local field potential activity associated with  
672 temporal expectations in the macaque lateral intraparietal area. *J Cogn Neurosci*, 24, 1314-  
673 30.
- 674 QUIAN QUIROGA, R., KRASKOV, A., KOCH, C. & FRIED, I. 2009. Explicit encoding of multimodal percepts  
675 by single neurons in the human brain. *Curr Biol*, 19, 1308-13.
- 676 QUIROGA, R. Q., REDDY, L., KREIMAN, G., KOCH, C. & FRIED, I. 2005. Invariant visual representation by  
677 single neurons in the human brain. *Nature*, 435, 1102-1107.
- 678 READ, J. C., PHILLIPSON, G. P., SERRANO-PEDRAZA, I., MILNER, A. D. & PARKER, A. J. 2010. Stereoscopic  
679 vision in the absence of the lateral occipital cortex. *PLoS One*, 5, e12608.
- 680 SAWAMURA, H., ORBAN, G. A. & VOGELS, R. 2006. Selectivity of neuronal adaptation does not match  
681 response selectivity: a single-cell study of the fMRI adaptation paradigm. *Neuron*, 49, 307-18.
- 682 SELF, M. W., PETERS, J. C., POSSEL, J. K., REITHLER, J., GOEBEL, R., RIS, P., JEURISSEN, D., REDDY, L.,  
683 CLAUS, S., BAAYEN, J. C., et al. 2016. The Effects of Context and Attention on Spiking Activity  
684 in Human Early Visual Cortex. *PLoS Biol*, 14, e1002420.
- 685 SIEGEL, M. & KONIG, P. 2003. A functional gamma-band defined by stimulus-dependent  
686 synchronization in area 18 of awake behaving cats. *J Neurosci*, 23, 4251-60.
- 687 SILSON, E. H., MCKEEFRY, D. J., RODGERS, J., GOUWS, A. D., HYMERS, M. & MORLAND, A. B. 2013.  
688 Specialized and independent processing of orientation and shape in visual field maps LO1 and  
689 LO2. *Nat Neurosci*, 16, 267-9.
- 690 SINKKONEN, J., TIITINEN, H. & NAATANEN, R. 1995. Gabor filters: an informative way for analysing  
691 event-related brain activity. *J Neurosci Methods*, 56, 99-104.
- 692 TALLON-BAUDRY, C. & BERTRAND, O. 1999. Oscillatory gamma activity in humans and its role in object  
693 representation. *Trends Cogn Sci*, 3, 151-162.
- 694 TALLON-BAUDRY, C., BERTRAND, O., DELPUECH, C. & PERMIER, J. 1997. Oscillatory gamma-band (30-  
695 70 Hz) activity induced by a visual search task in humans. *J Neurosci*, 17, 722-34.
- 696 TANAKA, K. 1996. Inferotemporal cortex and object vision. *Annu Rev Neurosci*, 19, 109-39.
- 697 TANAKA, K., SAITO, H., FUKADA, Y. & MORIYA, M. 1991. Coding visual images of objects in the  
698 inferotemporal cortex of the macaque monkey. *J Neurophysiol*, 66, 170-89.
- 699 TSUNODA, K., YAMANE, Y., NISHIZAKI, M. & TANIFUJI, M. 2001. Complex objects are represented in  
700 macaque inferotemporal cortex by the combination of feature columns. *Nat Neurosci*, 4, 832-  
701 8.
- 702 VAN DROMME, I. C., PREMEREUR, E., VERHOEF, B. E., VANDUFFEL, W. & JANSSEN, P. 2016. Posterior  
703 Parietal Cortex Drives Inferotemporal Activations During Three-Dimensional Object Vision.  
704 *PLoS Biol*, 14, e1002445.
- 705 VAN DROMME, I. C., VANDUFFEL, W. & JANSSEN, P. 2015. The relation between functional magnetic  
706 resonance imaging activations and single-cell selectivity in the macaque intraparietal sulcus.  
707 *Neuroimage*, 113, 86-100.
- 708 VANDUFFEL, W., ZHU, Q. & ORBAN, G. A. 2014. Monkey cortex through fMRI glasses. *Neuron*, 83, 533-  
709 50.
- 710 VERHOEF, B. E., VOGELS, R. & JANSSEN, P. 2010. Contribution of inferior temporal and posterior  
711 parietal activity to three-dimensional shape perception. *Curr Biol*, 20, 909-13.
- 712 VERHOEF, B. E., VOGELS, R. & JANSSEN, P. 2012. Inferotemporal cortex subserves three-dimensional  
713 structure categorization. *Neuron*, 73, 171-82.
- 714 VOGELS, R. 1999. Effect of image scrambling on inferior temporal cortical responses. *Neuroreport*, 10,  
715 1811-6.
- 716 WANDELL, B. A., DUMOULIN, S. O. & BREWER, A. A. 2007. Visual field maps in human cortex. *Neuron*,  
717 56, 366-83.
- 718 WELCHMAN, A. E., DEUBELIUS, A., CONRAD, V., BULTHOFF, H. H. & KOURTZI, Z. 2005. 3D shape  
719 perception from combined depth cues in human visual cortex. *Nat Neurosci*, 8, 820-7.

- 720 WESTWOOD, D. A. & GOODALE, M. A. 2011. Converging evidence for diverging pathways:  
721 neuropsychology and psychophysics tell the same story. *Vision Res*, 51, 804-11.
- 722 YAMANE, Y., CARLSON, E. T., BOWMAN, K. C., WANG, Z. & CONNOR, C. E. 2008. A neural code for  
723 three-dimensional object shape in macaque inferotemporal cortex. *Nat Neurosci*, 11, 1352-  
724 60.
- 725 YAMANE, Y., TSUNODA, K., MATSUMOTO, M., PHILLIPS, A. N. & TANIFUJI, M. 2006. Representation of  
726 the spatial relationship among object parts by neurons in macaque inferotemporal cortex. *J*  
727 *Neurophysiol*, 96, 3147-56.
- 728 YOSHIO, D., BOSKING, W. H., GHOSE, G. M. & MAUNSELL, J. H. 2007. Receptive fields in human visual  
729 cortex mapped with surface electrodes. *Cereb Cortex*, 17, 2293-302.

730

731
